# Supplementary material for: Gut–Joint Axis: Impact of Bifidobacterial Cell Wall Lipoproteins on Arthritis Development
Source: MDPI journal article supplement (doi:10.3390/nu15234861), 2023-11-21
Supplement: s1 [file s1]

| Intestine               | Distal Ileum                            |               |               | Caecum        |               |               | Colon         |               |               |
|-------------------------|-----------------------------------------|---------------|---------------|---------------|---------------|---------------|---------------|---------------|---------------|
| Treatment               | Water                                   | 0.5 Lpps      | 1.0 Lpps      | Water         | 0.5 Lpps      | 1.0 Lpps      | Water         | 0.5 Lpps      | 1.0 Lpps      |
| <i>E. coli</i>          | 3.1 ± 0.6 <sup>a</sup> (5) <sup>b</sup> | 3.8 ± 0.7 (6) | 4.0 ± 1.1 (7) | 4.7 ± 0.7 (5) | 5.1 ± 0.3 (6) | 5.6 ± 1.1 *   | 4.6 ± 1.1 (5) | 4.8 ± 0.8 (6) | 5.0 ± 0.9 (7) |
| <i>B. fragilis</i>      | 3.1 ± 0.7 (6)                           | 4.0 ± 0.3 (3) | 3.8 ± 0.6 (3) | 5.9 ± 1.4 (7) | 6.2 ± 0.8 (6) | 6.0 ± 0.5 (6) | 5.6 ± 1.3 (7) | 5.7 ± 0.4 (6) | 5.8 ± 0.5 (6) |
| <i>L. murinus</i>       | 6.6 ± 1.2                               | 6.3 ± 0.8 (7) | 5.6 ± 1.2     | 7.8 ± 1.4     | 7.9 ± 0.2     | 5.4 ± 0.4 *   | 7.6 ± 0.3     | 7.7 ± 0.6     | 7.7 ± 0.7     |
| <i>L. reuteri</i>       | 6.4 ± 0.8                               | 6.3 ± 0.7 (7) | 6.1 ± 0.8 (7) | 8.2 ± 0.4     | 8.2 ± 0.5     | 8.3 ± 0.4     | 7.5 ± 0.5     | 7.7 ± 0.5     | 7.7 ± 0.4     |
| <i>L. johnsonii</i>     | 6.1 ± 0.9                               | 6.1 ± 0.8     | 5.4 ± 1.3     | 7.9 ± 0.5     | 7.9 ± 0.5     | 8.0 ± 0.3 (7) | 7.4 ± 0.3     | 7.4 ± 0.4     | 7.3 ± 0.5 (7) |
| <i>Ruminococcus</i> sp. | 5.7 ± 0.4 (7)                           | 5.6 ± 0.4 (4) | 6.0 ± 0.8 (5) | 7.1 ± 0.3 (6) | 6.5 ± 0.3 (5) | 7.0 ± 0.6 (5) | 6.1 ± 0.8 (6) | 6.1 ± 1.1 (6) | 6.8 ± 0.9 (4) |

**Table S1.** Enumeration of selected bacteria at the end of CIA survey. <sup>a</sup>: mean ± SD (log cfu/g intestinal content), <sup>b</sup>: number of mice harboring detectable bacteria (out of 8 per group). \*: significant difference in bacterial counts (see Figure 1D). *Parabacteroides goldsteinii*, *Akkermansia mucinophila*, *Eubacterium plexicaudatum*, *Pseudoflavonifractor* sp., *Lactobacillus intestinalis* (ASF360) as well as *Clostridium* sp (ASF356) were undetectable in most of the samples. Primers for *Mucispirillum schaedlerii* did not allow for the detection of the specific sequence.

| Intestine               | Distal Ileum                            |               |                | Caecum        |               |               | Colon         |              |               |
|-------------------------|-----------------------------------------|---------------|----------------|---------------|---------------|---------------|---------------|--------------|---------------|
| Treatment               | Water                                   | Curative      | Preventive     | Water         | Curative      | Preventive    | Water         | Curative     | Preventive    |
| <i>P. goldsteinii</i>   | ND                                      | 4 (1)         | ND             | 6.3± 0.4 (2)  | ND            | ND            | 6.5± 0.5 (4)  | 6.2 (1)      | 5.7 ± 0.9 (3) |
| <i>A. mucinophila</i>   | 5.1 ± 0.8 <sup>a</sup> (5) <sup>b</sup> | ND            | 5.8 ± 0.05 (2) | 7.0± 1.5 (5)  | 7.3± 0.1 (2)  | 6.7± 1.3 (5)  | 8.3± 1.7 (3)  | 6.6± 1.3 (3) | 6.8± 1.8 (5)  |
| <i>E. coli</i>          | 4.2 (1)                                 | 5.4 ± 0.1 (2) | ND             | ND            | 5.8 (1)       | ND            | 3.9 (1)       | 4.7± 1.8 (2) | ND            |
| <i>B. fragilis</i>      | 3.6 ± 0.6 (2)                           | 4.1 ± 1.0 (3) | 4.1 ± 0.7 (5)  | 5.7 ± 0.7     | 5.8 ± 0.6     | 5.7 ± 0.9     | 6.6 ± 0.5     | 6.1 ± 0.4    | 6.0 ± 0.9 (7) |
| <i>L. murinus</i>       | 6.3 ± 0.8                               | 6.7 ± 0.9     | 6.8 ± 0.6      | 7.1 ± 0.5     | 7.6 ± 0.6     | 7.5 ± 1.0     | 8.1 ± 0.7     | 7.8 ± 0.6    | 7.5 ± 1.3     |
| <i>L. reuteri</i>       | 7.2 ± 0.9                               | 7.8 ± 1.1     | 7.3 ± 1.3      | 8.8 ± 0.4     | 9.1 ± 0.3     | 8.9 ± 0.8     | 9.3 ± 0.6     | 9.3 ± 0.5    | 9.2 ± 0.7     |
| <i>L. johnsonii</i>     | 6.8 ± 1.0                               | 7.5 ± 1.1     | 7.5 ± 1.4      | 8.7 ± 0.4     | 9.0 ± 0.4     | 9.2 ± 0.8     | 9.3 ± 0.7     | 9.1 ± 0.6    | 9.3 ± 0.7 (7) |
| <i>M. schaedlerii.</i>  | 5.7 ± 0.8 (7)                           | 5.3 ± 0.4 (6) | 6.4 ± 0.5 (6)  | 8.8 ± 0.9     | 8.9 ± 1.0     | 8.9 ± 1.4     | 8.5 ± 0.6     | 7.5 ± 0.8    | 8.3 ± 1.0 (7) |
| <i>E. plexicaudatum</i> | 5.2 (1)                                 | ND            | 5.5 (1)        | 6.3 ± 0.8 (6) | 6.8 ± 0.9 (2) | 7.2 ± 0.8 (5) | 8.1 ± 0.6 (5) | ND*          | 6.9 ± 1.3 (4) |

**Table S2.** Enumeration of selected bacteria at the end of CAIA survey. <sup>a</sup>: mean ± SD (log cfu/g intestinal content), <sup>b</sup>: number of mice harboring detectable bacteria (out of 8 per group). *Ruminococcus* sp. was undetectable in most of the samples. \*: Curative treatment induced a drop in colon *E. plexicaudatum* ( $p = 0.0325$  as compared with the control group).
